# Supplementary material
Source: publisher figshare collection journal article supplement (https://tandf.figshare.com/ndownloader/files/33107007)
Supplement: Supplementary file 1 [file 33107007]

**Supplemental Table 1. AEDs included in the analysis**

| Acetazolamide  Aminohydroxybutyric acid  Brivaracetam  Cannabidiol |
| --- |
| Carbamazepine |
| Clobazam |
| Clonazepam |
| Eslicarbazepine  Ethosuximide |
| Ethotoin  Ezogabine  Felbemate  Fosphenytoin  Gabapentin |
| Lacosamide |
| Lamotrigine |
| Levetiracetam |
| Perampanel  Phenacemide  Piracetam  Oxcarbazepine |
| Phenobarbitol |
| Phenytoin |
| Pregabalin |
| Primidone |
| Pyrrolidinone derivatives  Rufinamide  Stiripentol  Succinimides  Sulthiame  Tiagabine |
| Topiramate |
| Trimethadione  Valproic Acid |
| Vigabatrin  Zonisamide |

**Supplemental Table 2. Trends in selected AED poisonings by age-group and reason for exposure.1**

|  | **All Exposures** | **Intentional Exposures Only** |
| --- | --- | --- |
|  | **IRR (95% CI)** | **IRR (95% CI)** |
| **Carbamazepine** |  |  |
| **Overall** | 0.918 (0.911, 0.926) | 0.945 (0.937, 0.954) |
| **10-14** | 0.904 (0.895, 0.914) | 0.944 (0.930, 0.959) |
| **15-19** | 0.930 (0.922, 0.938) | 0.946 (0.935, 0.957) |
| **Clonazepam** |  |  |
| **Overall** | 0.997 (0.987, 1.008) | 1.003 (0.991, 1.016) |
| **10-14** | 0.987 (0.974, 1.000) | 0.992 (0.976, 1.008) |
| **15-19** | 1.008 (0.992, 1.024) | 1.014 (0.997, 1.031) |
| **Gabapentin** |  |  |
| **Overall** | 1.041 (1.025, 1.058) | 1.054 (1.034, 1.073) |
| **10-14** | 1.035 (1.014, 1.057) | 1.051 (1.022, 1.080) |
| **15-19** | 1.047 (1.023, 1.071) | 1.056 (1.030, 1.084) |
| **Lamotrigine** |  |  |
| **Overall** | 1.136 (1.112, 1.161) | 1.162 (1.133, 1.191) |
| **10-14** | 1.125 (1.098, 1.152) | 1.158 (1.127, 1.190) |
| **15-19** | 1.147 (1.108, 1.188) | 1.161 (1.115, 1.208) |
| **Oxcarbazepine** |  |  |
| **Overall** | 1.042 (1.012, 1.073) | 1.045 (1.014, 1.078) |
| **10-14** | 1.048 (1.005, 1.092) | 1.052 (1.008, 1.098) |
| **15-19** | 1.036 (0.994, 1.080) | 1.038 (0.994, 1.085) |
| **Pregabalin** |  |  |
| **Overall** | 1.238 (1.118, 1.369) | 1.225 (1.128, 1.330) |
| **10-14** | 1.227 (1.077, 1.397) | 1.195 (1.093, 1.307) |
| **15-19** | 1.249 (1.068, 1.460) | 1.254 (1.088, 1.444) |
| **Tiagabine** |  |  |
| **Overall** | 0.727 (0.663, 0.796) | 0.683 (0.597, 0.781) |
| **10-14** | 0.730 (0.629, 0.847) | 0.723 (0.595, 0.879) |
| **15-19** | 0.725 (0.645, 0.815) | 0.659 (0.551, 0.789) |
| **Topiramate** |  |  |
| **Overall** | 1.053 (1.039, 1.067) | 1.064 (1.049, 1.079) |
| **10-14** | 1.056 (1.040, 1.072) | 1.072 (1.049, 1.095) |
| **15-19** | 1.049 (1.028, 1.071) | 1.057 (1.038, 1.077) |
| **Valproic Acid​** |  |  |
| **Overall** | 0.955 (0.950, 0.960) | 0.957 (0.949, 0.964) |
| **10-14** | 0.947 (0.941, 0.954) | 0.949 (0.936, 0.963) |
| **15-19** | 0.961 (0.954, 0.968) | 0.962 (0.953, 0.970) |

1All “Overall” estimates adjusted for age-group
